# Supplementary material for: First-in-human controlled inhalation of thin graphene oxide nanosheets to study acute cardiorespiratory responses
Source: PubMed Central journal article supplement (PMC11106005; doi:10.1038/s41565-023-01572-3), 2024-02-16
Supplement: 41565_2023_1572_MOESM1_ESM.pdf [file 41565_2023_1572_MOESM1_ESM.pdf]

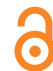

---

# First-in-human controlled inhalation of thin graphene oxide nanosheets to study acute cardiorespiratory responses

---

In the format provided by the authors and unedited

---

**First-in-human controlled inhalation of thin  
graphene oxide nanosheets  
to study acute cardiorespiratory responses**

**SUPPLEMENTARY MATERIAL**

**Contents**

|                                                                             | <u>Page</u> |
|-----------------------------------------------------------------------------|-------------|
| <b>Methods in Full</b>                                                      | <b>2</b>    |
| <b>Supplementary Results and Discussion</b>                                 | <b>13</b>   |
| <b>Supplementary References</b>                                             | <b>17</b>   |
| <b>SUPPLEMENTARY TABLE S1. Volunteer inclusion and exclusion criteria</b>   | <b>20</b>   |
| <b>SUPPLEMENTARY FIGURE S1. Particle exposure characteristics</b>           | <b>21</b>   |
| <b>SUPPLEMENTARY FIGURE S2. Schematic of the mobile exposure laboratory</b> | <b>22</b>   |

## 27 **Methods in Full**

28

### 29 **Graphene oxide synthesis**

30 Aqueous dispersions of s-graphene oxide and us-graphene oxide were prepared as described in our  
31 previous studies<sup>1,2</sup> by a modified Hummers' method coupled with sonication. We used depyrogenised  
32 glassware and graphene oxide suspensions were always handled under endotoxin-free conditions.  
33 Graphite powder was mixed with sodium nitrate and sulphuric acid by rigorous stirring at low  
34 temperature (ice bath), followed by the addition of potassium permanganate. Water-for-injections was  
35 added dropwise to the reaction volume, while carefully monitoring the temperature rise. The mixture  
36 was stirred for 30 min at 98°C (oil bath), before stopping the reaction with hydrogen peroxide and  
37 leaving for 1 hour. The dispersion was subjected to a series of washes with water-for-injections in order  
38 to neutralise the pH, remove the impurities and separate the graphene oxide from the graphitic residues.  
39 On the last two washing steps, graphene oxide was exfoliated by vortexing and solubilised in with warm  
40 water-for-injections from the orange gel layer which formed at the top of the graphite oxide. Any  
41 graphitic residues still present in the dispersion were removed by an additional centrifugation step at  
42 24-h post-reaction. Size reduction to small and ultra-small flakes was carried out by sonication for 5  
43 min and 4-h, respectively.

### 44 **Characterisation of graphene oxide nanosheets**

45 Graphene oxide was comprehensively characterised (*Main Manuscript Figure 1, Extended Data Table*  
46 *ED1, Figure ED1*) by the following methods:

47 *Atomic force microscopy (AFM)*. A multimode atomic force microscope (Bruker, UK) was used in  
48 tapping mode, using Otespa-R3 probes (Bruker, UK). Samples were prepared on poly-L-lysine 0.01%  
49 (Sigma Aldrich P4707) coated mica substrates, by drop-casting a volume of 20 µL of 100 µg/mL  
50 graphene oxide dilution in Milli-Q water for 1 min, followed by a washing step with 1 mL Milli-Q water  
51 and drying overnight in a drying cabinet (37°C). Scanning parameters were set as follows: 1 Hz scanning  
52 rate, 250 mV amplitude set-point, 512 lines per scan, an integral gain of 1 and a proportional gain of 5.  
53 Images were processed with the Bruker Nanoscope Analysis software-Version 1.4; the lateral size of  
54 the graphene oxide flakes was manually measured by determining the longest Feret diameter in each  
55 flake.

56 *Transmission electron microscopy (TEM)*. TEM analysis was performed on an FEI Tecnai 12 BioTwin  
57 equipment (FEI, Eindhoven, NL) with the electron beam set to 100 kV. The samples were prepared on  
58 300-mesh carbon-coated copper grids at room temperature and in a clean environment. A volume of 20  
59 µL of graphene oxide dispersion was drop-casted on the grid and the excess was removed after 1 min  
60 with filter paper, leaving a thin layer of suspension to fully dry. A small drop was casted and left to dry  
61 at the edge of the grid. Images were captured with an AMT digital camera (Gatan, UK). The raw data

62 were further processed using ImageJ; the lateral size of the graphene oxide flakes was manually  
63 measured by determining the longest Feret diameter in each flake,  $n$  being the total number of flakes  
64 analyzed.

65 *Hydrodynamic diameter and surface charge (zeta potential) measurements.* The hydrodynamic  
66 diameter and the zeta potential values of graphene oxide suspensions in Milli-Q water were measured  
67 with a ZetaSizer Nano ZS instrument (Malvern, UK). The results are reported as the average  $\pm$  standard  
68 deviation of three measurements per sample.

69 *UV-visible spectroscopy (UV-vis).* Spectra of graphene oxide dilutions in Milli-Q water with  
70 concentrations ranging from 2.5 to 20  $\mu\text{g/mL}$  were acquired using a Cary 50 Bio UV-vis  
71 spectrophotometer (Varian Inc., Agilent Technologies, UK). Measurements were performed at room  
72 temperature in a quartz cuvette (1 mL volume, 1 cm path length). Milli-Q water was used as a blank.

73 *Fluorescence spectroscopy.* Different concentrations of graphene oxide dispersions (25–200  $\mu\text{g/mL}$ )  
74 were measured with a Cary Eclipse fluorescence spectrophotometer (Varian Inc., Agilent Technologies,  
75 UK). Spectra were acquired at room temperature, with  $\lambda_{\text{exc}}$  set to 525 nm. Milli-Q water was used as a  
76 blank.

77 *Raman spectroscopy.* Measurements were recorded by a DXR micro-Raman spectrometer (Thermo  
78 Fisher Scientific, UK) equipped with a 633 nm laser set to 0.4 mW. Calibration was performed on a  
79 polystyrene standard, the chosen objective was 50x, and the pinhole was set to 50  $\mu\text{m}$ . Spectra were  
80 then recorded between 500 and 4000  $\text{cm}^{-1}$  with a resolution of 2.5  $\text{cm}^{-1}$ . All spectra were processed by  
81 background subtraction and normalisation by the G band intensity using OriginPro 8.5.1 software.

82 *Fourier transform infrared spectroscopy (FTIR).* Fourier transform infrared spectra were obtained with  
83 a Tensor 27 spectrometer (Bruker, UK), equipped with a 3000 Series High Stability Temperature  
84 Controller with RS232 Control (Specac, UK) and a MKII Golden Gate Single Reflection ATR system  
85 (Specac, UK) for measurements in ATR mode. The bottom plate of the Golden Gate ATR system was  
86 pre-heated at 60°C to allow the complete evaporation of water from the drops (typically 20  $\mu\text{L}$ ) of the  
87 original graphene oxide dispersions. Approximately 3 min after depositing the dispersions on the plate,  
88 the transmittance spectra of graphene oxide were recorded by acquiring 32 scans in the 4000-750  $\text{cm}^{-1}$   
89 range, with a resolution of 4  $\text{cm}^{-1}$ .

90 *Thermogravimetric analysis (TGA).* The oxidation degree of graphene oxide materials was extracted  
91 from the degradation patterns measured with a TGA 4000 thermogravimetric analyser (PerkinElmer  
92 Ltd, UK). All measurements were carried out on 2 mg lyophilised material, in a nitrogen atmosphere  
93 (20 mL/min) at temperatures ranging from 25 to 900°C (10°C/min).

94 *X-ray photoelectron spectroscopy (XPS).* XPS measurements of lyophilised graphene oxide samples  
95 were analysed using a Thermo Theta Probe XPS spectrometer with a monochromatic Al K-  $\alpha$  source of

1486.68 eV. The spectra were acquired with PE of 40 kV, 0.1 eV step size and an average of 20 scans. CasaXPS software (Casa Software Ltd, UK) was used for post-processing of spectra. The contribution of charge injected to insulating samples was corrected by calibrating all peaks according to the adventitious carbon C1s spectral component, set a binding energy of 284.6eV<sup>3</sup>. A Shirley background subtraction was applied to all spectra and Gaussian–Lorentzian (70:30) functions were used for fitting the functional groups, except for the asymmetric C–C and C=C peak, which was fitted using an asymmetric Lorentzian function. The full width half maximum (FWHM) value was constrained between 0.5 and 2 eV for all peaks, except for the  $\pi$ – $\pi^*$ . The following constrain regions were set for the binding energies: 284-285.5 for C-C/C=C, 285.5-286.5 for C-O, 286.8-287.8 for C=O, 288.6-290 for COOH and >290 for  $\pi$ -  $\pi^*$ .

### 126 **Nanoparticle exposure and characterisation**

127 Nanoparticles exposures were performed by the National Institute for Public Health and the Environment (RIVM) in a mobile exposure laboratory positioned outside the main Royal Infirmary of Edinburgh (**Figure S2**), under the supervision of an experienced exposure technician. Stock suspensions of graphene oxide (2 mg/mL for s-graphene oxide; 1.3 mg/mL for us-graphene oxide) were made in sterile distilled water and were free of any bacterial contamination confirmed by absence of bacterial colonies on solid Luria-Bertani agar test and absence of endotoxin (<0.2 EU/ $\mu$ g, level of TNF alpha secreted by bone marrow-derived macrophages exposed to graphene oxide was similar to control untreated cells using previously published method<sup>4</sup>). S-graphene oxide was diluted to 1.3 mg/mL in sterile saline in aseptic conditions, aliquoted and stored at 4°C until use.

128 Graphene oxide nanosheets (1.3 mg/mL) were aerosolized using a Schlick (Dusen-Schlick, model 970/S Untersiemau, Germany) compressed air nebulizer. Using two syringe pumps (TSE Systems, model 540200, Germany) the suspension was in-line diluted with high-performance liquid chromatography grade water and fed to the Schlick nebulizer. The suspension was transferred to a 5 mL syringe which was placed on the syringe pump and connected to the nebulizer. The compressed pre-heated (60°C) airflow of the Schlick nebulizer was 12l pm. The aerosol was dried in a heated mixing glass tube (90 mm ID, length 550 mm), then diluted with high efficiency particulate air-filtered room air to the desired concentration, humidified to 50-60% relative humidity using an ultrasonic nebulizer (Omron Ultrasonic Nebulizer NE-U12, Japan). The aerosol was fed into a 200 L mixing chamber and delivered to the volunteer by an exposure mask placed over the mouth and nose. Temperature was kept constant throughout and relative humidity of exposure air was 50% maintained using fresh ultrapure water injected into a small side stream using an Omron ultrasonic nebulizer. Graphene oxides were delivered at an exposure concentration between 100 - 300  $\mu$ g/m<sup>3</sup>, with a target average concentration of 200  $\mu$ g/m<sup>3</sup> (**See Figure S1**). This dose range was chosen based on our previous controlled exposure studies with dilute diesel exhaust, which were associated with impairment of a range of cardiovascular

131 parameters without adverse effects<sup>5,6</sup> and with carbon and gold nanoparticles which did not alter  
132 cardiovascular parameters<sup>7,8</sup>. The concentration could be adjusted by altering the speed of the syringe  
133 pump delivering the suspension. The real-time mass concentration was measured by a tapered element  
134 oscillating microbalance (TEOM; Thermo Scientific, model 1400A, USA) as a guide for changing the  
135 speed of the pump. The concentration of the particles in the exposure was monitored and maintained by  
136 the exposure technicians.

137 Particle concentration in the aerosol was taken from the middle of the 200 L mixing chamber  
138 by a SS-tube. The particle characteristics measured were: particle mass (TEOM, as well as by  
139 gravimetric filter based analyses), particle number (condensation particle counter, TSI Inc. model  
140 3022A CPC, USA), and particle size distribution by a PALAS differential electrical mobility classifier,  
141 (U-DEMC model 2200, Germany) and an optical particle sizer (TSI Inc, model 3330, USA). Particle  
142 mass was also determined post-exposure by calculating the accumulated mass on pre-weighed telfon  
143 filters (Teflo 47 mm, R2PJ047 Pall Corp., USA) taken from the metal tubing close to the volunteer  
144 exposure mask, followed by drying and weighing on a microbalance (Sartorius MC5, Germany), and  
145 an average taken from 2 duplicate filters.

146

#### 147 **Ethical Review Statement**

148 This study was designed with rigorous ethical review, with procedures being run by experienced  
149 clinicians and nursing support, and performed at a major hospital with the necessary emergency  
150 facilities should an adverse event have occurred. The study was performed in accordance with the  
151 Declaration of Helsinki, favourable ethical opinion of the University of Edinburgh, NHS Academic  
152 and Clinical Central Office for Research and Development (ACCORD), Research Ethics Committee  
153 (18-HV-084) and with written informed consent from all participants. The study has been registered  
154 on Clinicaltrials.gov (<https://www.clinicaltrials.gov/api/gui>), reference number: NCT03659864. This  
155 research conforms with Nature journals' Author Inclusion and Ethics recommendations.

156

#### 157 **Participants and eligibility criteria**

158 Fifteen healthy volunteers were recruited by advertising the study by posters and e-mails in the hospital  
159 and university campus, as approved by local ethical review. The data from 14 subjects were included as  
160 one subject was unable to complete the exposure visits in the time-frame of the study. The target of 15  
161 individuals was based on our previous controlled exposure studies with air pollutants based on changes  
162 to vascular reactivity and inflammatory cytokines in the blood, based on diesel exhaust exposure as  
163 there is no other controlled exposure study of a two dimensional material for comparisons. A 1-h  
164 exposure to diluted diesel exhaust produced an ~32% reduction in forearm bloodflow to 1 nmol/min  
165 bradykinin (~16±2 vs ~19±2.5 mL/100 mL tissue/min (±SD) for diesel exhaust vs filtered air control,  
166 respectively<sup>9</sup>. A 2-h exposure to diluted diesel exhaust produced a 12.5% increase of plasma TNF-

167  $\alpha$  ( $0.99\pm 0.07$  vs  $0.88\pm 0.007$  pg/mL ( $\pm$ SD) for diesel exhaust vs filtered air, respectively<sup>10</sup>. Based on  
168 these figures, 12 and 10 volunteers, respectively, would be needed to detect these changes with  
169 significant of  $P < 0.05$  with an 80% power. Because no other study has tested the effects of an inhaled  
170 2D material, as an additional precautionary step, the decision was taken not to increase group sizes  
171 beyond 15 for this study.

172 Interested volunteers were provided with a participant information sheet which they were asked  
173 to read and consider for at least 24 h before agreeing to be involved in the study. For study visits,  
174 participants abstained from alcohol for 24 h and from food and caffeine containing beverages for at least  
175 12 h prior to the study visit. Participants were invited for an initial screening visit to ensure that they  
176 met the inclusion criteria (**Table S1**). Exclusion criteria included major or traumatic surgery within 12  
177 weeks of screening, a history of and smoking or asthma, occupation with high exposure to air pollution  
178 or other inhaled irritant, acute respiratory illness within 3 weeks of enrolment, use of aspirin or anti-  
179 inflammatory medication or vitamin and herbal supplements for the week prior to their study visit.  
180 Women who were pregnant, lactating or taking contraceptive medication were also excluded from the  
181 study. We did not ask participants to wear a facemask outside of the study visits, as low compliance  
182 would have added an additional source of variability between participants (the study was run prior to  
183 the coronavirus pandemic before mask wearing became common in the UK). Additionally, even  
184 occupational facemasks have been shown to vary greatly in their removal of inhaled particles during  
185 different modes of activity<sup>11</sup>. Importantly, each volunteer acts as their own control and receives each  
186 exposure in a random order, minimising variation from both intrinsic biology and life-style factors.

187

## 188 **Study Design**

189 See **Main Manuscript Figure 2**. A screening visit was used to confirm eligibility criteria with the  
190 participant, followed by taking written consent and assignment of a participant code. Height, weight,  
191 heart rate, blood pressure and lung function were measured, and a 3-mL blood sample was taken for a  
192 full blood cell count. If parameters were within the normal range for young healthy individuals,  
193 participants were taken forward to full study days. Additionally, a graded cardio-respiratory exercise  
194 stress test on a bicycle ergometer was performed to determine the workload required to generate a  
195 ventilation rate of 25 L/min/m<sup>2</sup>.

196 Two lateral dimensions of GO (maintaining all other physicochemical characteristics almost  
197 identical) were selected for the study: ‘small’ GO (s-GO) and ‘ultrasmall’ GO (us-GO). Both types of  
198 nanosheets have demonstrated neither acute, nor longitudinal adverse effects in our previous pre-clinical  
199 (rodent) studies<sup>2</sup>, contrary to ‘large’ GO sheets that were thus excluded from this work as a safety  
200 precaution. A double-blind randomised crossover study design was used for the study visits, whereby  
201 the order of exposures (filtered air, s-graphene oxide, us-graphene oxide) were randomised. All study  
202 visits were organised at least 2 weeks apart to allow a washout period between different exposures. The

203 volunteer and clinician performing the study were blinded to the identity of the exposure group. All  
204 researchers involved with collating and analysing the raw data were blinded to the exposure group, with  
205 unblinding occurring only when ready for grouping by exposure.

206 Prior to exposures ( $t=0$ ), heart rate, blood pressure and lung function were measured, and blood  
207 taken. Participants were asked to empty their bladders and then given a urine container to collect any  
208 urine over the course of the study visit. Participants were then taken to the exposure laboratory based at  
209 the Royal Infirmary of Edinburgh site for the duration of the study. An experienced research clinician  
210 and exposure technician were present throughout the exposure, with the same researcher and nursing  
211 support present during the rest of the protocol.

212 In the exposure laboratory (**Figure S2**), participants wore a face mask through which  
213 nanoparticles could be delivered by inhalation. Volunteers were asked to cycle at the workload required  
214 to increase respiratory rate to 25 L/min/m<sup>2</sup> (pre-determined by exercise testing at the screening visit)  
215 and rest alternatively for 15-min periods across the 2-h exposure. After exposure, the subject returned  
216 to the Clinical Research Facility for assessment of biological parameters.

217 Vital signs, lung function and blood collected pre-exposure ( $t=0$ ), were repeated at  $t=2.25$ , 4  
218 and at 6 h (ie 15 min, 2 h and 4 h after exposure). For ease of reading, the 2.25-h time point is referred  
219 to as  $t=2$  throughout the manuscript). The *ex vivo* model of deep arterial injury was performed at 1-1.5  
220 h post exposure, and forearm plethysmography performed at 2-4 h post-exposure (see below). A light  
221 lunch was provided that was identical for all volunteers and all study visits. As an additional safety  
222 measure, a shortened protocol (without the *ex vivo* thrombosis and plethysmography or 4-h  
223 measurements) was performed for first exposure of each group. The study visits for the subsequent  
224 volunteers with the full protocol were scheduled only after it was confirmed that there were no adverse  
225 events and no marked changes in blood biomarkers. Volunteers were compensated for their time and  
226 travel expenses, which was approved by the ethics committee.

227

### 228 **Lung function and vital signs**

229 The participants were asked to rest in a sitting position for 15 min prior to measurement of vital signs  
230 and lung function. Lung function was measured by spirometry (Vitalograph Alpha III, UK), with the  
231 optimal breathing techniques that were demonstrated at the screening visit. Forced expiratory volume  
232 in 1 second (FEV<sub>1</sub>) and forced vital capacity (FVC) were then measured, and a mean of two closely  
233 concurring consecutive runs were used. The participants were allowed to rest for a further 5 min, prior  
234 to measurement of blood pressure and heart rate by sphygmomanometry.

235

### 236 **Vascular function**



237 The clinical protocol was designed to include measurement of vascular function by venous occlusion  
238 plethysmography between  $t=4$  and  $t=6$  h. However, due to technical and staffing difficulties we were  
239 unable to obtain reliable data from sufficient volunteers to make meaningful conclusions, thus the data  
240 was omitted. Data analysis was performed after the collection of all study visits, thus the technique was  
241 a part of the protocol for all study visits, and subsequently the methods are outlined below. Blood flow  
242 was determined using mercury-in-silastic strain gauges placed around each forearm, as previously  
243 described<sup>5</sup>. The brachial artery of the non-dominant arm was cannulated with a 27-standard wire gauge  
244 steel needle under local anaesthetic. After a 30-minute baseline saline infusion, acetylcholine  
245 (endothelium-dependent vasodilator) at 5, 10, and 20  $\mu\text{g}/\text{min}$  or sodium nitroprusside (an endothelium-  
246 independent vasodilator) at 2, 4, and 8  $\mu\text{g}/\text{min}$  were infused at a rate of 1 mL/min for 6 minutes at each  
247 dose. Vasodilators were obtained at clinical grade by the Royal Infirmary of Edinburgh Pharmacy. The  
248 two vasodilators were separated by 20-minute saline infusions and given in a randomized order, with  
249 the researcher blinded to the drug infusion. Expansion of the forearm was measured during venous  
250 occlusion and the gradient of the expansion of the forearm was used to determine blood flow, indicating  
251 of the ability of arteries to dilate in the presence and absence of vasodilators. Data was recorded on  
252 LabChart Reader software (ADInstruments) and exported to Microsoft Excel for analysis.

253

#### 254 **Blood biomarkers**

255 Blood was sampled before nanoparticle exposure ( $t=0$ ) and at 2.25, 4 and 6 h. A 17-gauge cannula was  
256 inserted into a large antecubital vein of both arms, and flushed with sterile saline. First, 1 mL of blood  
257 was discarded and approximately 27 mL was then collected for analysis. EDTA-treated blood was used  
258 for measurement blood cell differentials, citrate-treated blood was used for coagulation markers  
259 (activated partial thromboplastin time, prothrombin time, fibrinogen) and clotted blood was used to  
260 collect serum for C-reactive protein (CRP) and cytokines (IL-6,  $\text{TNF}\alpha$ ). Blood measures were  
261 performed by the Clinical Biochemistry Unit at the NHS Royal Infirmary of Edinburgh by standard  
262 methodology. Cytokines were measured using ELISA (R&D Systems, UK), with limits of detection of  
263 0.022 pg/mL for  $\text{TNF}\alpha$  and 0.031 pg/mL for IL-6. Details of -omics analysis of blood factors are  
264 described below. Subsamples of blood and urine were frozen at  $-80^\circ\text{C}$  for biobanking.

265

#### 266 ***Ex vivo* thrombosis**

267 The coagulability of blood was measured *ex vivo* using a model of thrombosis on deep arterial injury  
268 (**Main Manuscript Figure 6**). We have used this technique extensively in our clinical studies following  
269 exposure of volunteers to diesel exhaust<sup>6,12</sup> and testing of antithrombotic medication<sup>13,14</sup>. Blood was  
270 withdrawn from an antecubital vein via a pump set at a flow rate of 10 mL/min. The first 5 mL of blood  
271 was discarded, before the cannula was connected, using non-coagulation tubing (Masterflex Tygon,

272 Cole Parmer, UK), to three sequential cylindrical perfusion chambers maintained at 37°C in a water  
273 bath. Strips of porcine aorta (Pel-freez, USA) were prepared by carefully removing the intima and a thin  
274 layer of media to act as a thrombogenic substrate, and mounted in the chamber according to  
275 physiological direction of blood flow. The rheological conditions in the first chamber simulate those of  
276 patent coronary arteries (low-shear rate, ~212/s), whereas those in the second and third chambers  
277 simulate those of mildly stenosed coronary arteries (high-shear rate, ~1690/s). The model thus acts as  
278 one of deep coronary arterial injury. Each chamber run lasted for 5 min after which saline was perfused  
279 over the strip to remove non-adherent blood. The porcine strips with thrombus attached were removed  
280 and fixed in 4% paraformaldehyde. Strips were cut into 8 cross-sections, wax-embedded, histologically  
281 sectioned and endogenous peroxidase activity was blocked using 3% hydrogen peroxide solution (Leica  
282 Microsystems GmbH, Wetzlar, Germany) for 5 min. Sections were then incubated at room temperature  
283 for 1-h with polyclonal rabbit anti-human fibrin(ogen) antibody (1.2 µg/mL, Dako, Glostrup, Denmark;  
284 Cat. No. A0080) and monoclonal mouse anti-human CD61 antibody (1.28 µg/mL, Dako; Cat. No.  
285 M0753). Antigen visualization was performed using a Bond Polymer refine detection kit (Leica  
286 Microsystems GmbH) and treatment with 3,3'-diaminobenzidine substrate chromogen (66 mM, Dako).  
287 Finally, sections were counterstained with haematoxylin followed by direct red 80 (0.1% sirius red).

288 A semi-automated slide scanner (Axioscan Z1; Zeiss, Jena, Germany) and image analysis  
289 software (QuPath 0.2.3) were used by a blinded researcher to quantify thrombus area. Digital images of  
290 each section were acquired at ×20 magnification. High-resolution classifiers based on colour were  
291 established to detect total thrombus area. Two blinded researchers quality assessed images and sections  
292 were discarded if there was evidence of poor vascular integrity, thrombosis forming at a disrupted  
293 surface layer, or that the thrombus was dislodged from the arterial strip. Strips with less than three  
294 sections per arterial strip were discarded.

295

### 296 **High-fidelity nano-proteomics analysis of plasma samples.**

297 *Preparation of liposomal nanoparticles and enrichment of plasma proteins.* HSPC:Chol:DSPE-PEG2000  
298 (56.3:38.2:5.5) liposomes were prepared by thin lipid film hydration followed by extrusion, as  
299 previously described<sup>15</sup>. Lipids were dissolved in chloroform:methanol (4:1) and evaporated (150  
300 rotations/min for 1 h under vacuum, 40°C) using a rotary evaporator (Buchi, Switzerland). Lipid films  
301 were hydrated at 60°C with ammonium sulphate (250 mM, pH 8.5) to produce large multilamellar  
302 liposomes. Small unilamellar liposomes were then produced by extrusion through 800 nm and 200 nm  
303 polycarbonate filters (Whatman, UK) for 10 times each, and then 15 times through 100 nm and 80 nm  
304 extrusion filters (Whatman, UK) using a mini-Extruder (Avanti Polar Lipids, USA).

305 Plasma samples used were those obtained at the beginning (t=0) and the end (t=6) of the  
306 protocol, with 76 samples analysed in total: air (n=27), s-graphene oxide (n=23) and us-graphene oxide  
307 (n=26). Liposomes (180 µL) and human plasma (820 µL) were incubated on an orbital shaker

308 (ThermoFisher, MaxQ™ 4450 Benchtop Orbital Shaker) for 10 min (37°C, 8150g). Protein-coated  
309 liposomes were separated from excess plasma proteins following a previously described<sup>16</sup>. two-step  
310 purification protocol that included size exclusion chromatography and membrane ultrafiltration.  
311 Proteins bound to the liposome nanoparticles were quantified by BCA Protein assay kit according to the  
312 manufacturer's instructions.

313 Nanoparticle-bound proteins (10 µg) were mixed with lysis buffer (10 µL) containing 5% SDS,  
314 triethylammonium bicarbonate (TEAB, 50 mM, pH 7.5) to allow protein solubilisation. Samples were  
315 reduced with dithiothreitol (5 mM), alkylated with iodoacetamide (15 mM) and dithiothreitol (5 mM)  
316 added again to quench the alkylation reaction. Samples were centrifuged (14,000g, 10 min) to collect  
317 the protein lysates, then mixed with phosphoric acid (12%) and six-volume equivalents of S-trap binding  
318 buffer (90% aqueous methanol with TEAB (100 mM, pH 7.1)). Samples were added to a S-trap column  
319 and centrifuged (4000g, 2 min) to trap proteins in the columns. Pelleted proteins were washed four  
320 times with S-trap binding buffer, then digested with trypsin (0.1 µg/µL, 47°C, 1 h). Peptide samples  
321 were extracted using digestion buffer (50 mM TEAB), 0.1% aqueous formic acid and 30 % aqueous  
322 acetonitrile containing 0.1 % formic acid. Finally, peptide samples were desalted by oligo R3 beads in  
323 50% acetonitrile, dried using a vacuum centrifuge (Heto Speedvac) and stored at 4°C until analysed.  
324 Samples were analysed by liquid chromatography mass spectrometry (LC-MS)/mass spectrometry  
325 (MS) using an UltiMate® 3000 Rapid Separation lipid chromatography platform (RSLC, Dionex  
326 Corporation, USA) coupled to a Q Exactive™ Hybrid Quadrupole-Orbitrap™ mass spectrometer  
327 (Thermo Fisher Scientific, USA).

328 *Data Analysis.* To statistically compare the abundance of proteins identified in the liposomal coronas,  
329 mass spectrometry peak intensities were analyzed by importation of the DAW files into Progenesis LC-  
330 MS software (version 3.0; Nonlinear Dynamics) with automatic feature detection enabled. A  
331 representative reference run was selected automatically, to which all other runs were aligned in a pair-  
332 wise manner. Automatic processing was selected to run with applied filters for peaks charge state  
333 (maximum charge 5) and a protein quantitation method with relative quantitation using Hi-N with N=3  
334 peptides to measurements per protein. The resulting MS/MS peak lists were exported as a single Mascot  
335 generic file and loaded onto a local Mascot Server (version 2.3.0; Matrix Science, UK). The spectra  
336 were searched against the UniProt database using the following parameters: tryptic enzyme digestion  
337 with one missed cleavage allowed, peptide charge of +2 and +3, precursor mass tolerance of 15 mmu,  
338 fragment mass tolerance of 8 ppm, oxidation of methionines as variable modifications and  
339 carbamidomethyl as fixed modifications, with decoy database search disabled and ESI-QUAD-TOF as  
340 the selected instrument. Each search produced an XML file from Mascot and the resulted peptides  
341 (XML files) were imported back into Progenesis LC-MS to assign peptides to features. Data were  
342 filtered to present a 1% false discovery rate (FDR) and a score above 21 through the 'refine  
343 identification' tab of Progenesis QI toolbox.

344

### 345 Targeted analysis of eicosanoids and related bioactive lipid mediators

346 Targeted lipidomic analysis was undertaken using a panel of >50 eicosanoids that included  
347 *prostaglandins* (PGD<sub>2</sub>, PGE<sub>2</sub>, PGF<sub>2α</sub>, 13,14-dihydro-15-keto-PGD<sub>2</sub>, 13,14-dihydro-15-keto-PGE<sub>2</sub>, 11-  
348 beta-PGF<sub>2α</sub>, 6-keto-PGF<sub>1α</sub>, 15-deoxy-Δ<sup>12,14</sup>-PGD<sub>2</sub>, 15-deoxy-Δ<sup>12,14</sup>-PGJ<sub>2</sub>); *thromboxanes* (TxB<sub>2</sub>, 11-  
349 dehydro-TxB<sub>2</sub>); *hydroxy-eicosatetraenoic acids* (5-HETE, 8-HETE, 9-HETE, 11-HETE, 12-HETE, 15-  
350 HETE, 20-HETE); *leukotrienes* (LTB<sub>4</sub>, 20-carboxy-LTB<sub>4</sub>); *epoxy-eicosatrienoic acids* (5,6-EET, 8,9-  
351 EET, 11,12-EET, 14,15-EET; 5-OxoETE, 15-OxoETE); *dihydroxy-eicosatrienoic acids* (5,6-DHET,  
352 8,9-DHET, 11,12-DHET, 14,15-DHET), *hydroxy-eicosapentaenoic acids* (5-HEPE, 15-HEPE),  
353 *octadecadienoic acids* (9-HODE; 13-HODE; 9-Oxo-ODE, 13-Oxo-ODE), *epoxyoctadecamonoenoic*  
354 *acids* (9,10-EpOME, 12,13-EpOME), *pro-resolving mediators* (lipoxin A<sub>4</sub> - LXA<sub>4</sub> and resolvins, RvD1,  
355 RvD2); *isoprostanes* (8-iso-PGF<sub>2α</sub>) and *fatty acids* (arachidonic acid - AA, eicosapentaenoic acid - EPA,  
356 docosahexaenoic acid - DHA and its metabolites, 7-HDHA; 14-HDHA; 17-HDHA; 10,17-DiHDHA).

357 Plasma was prepared from EDTA-treated blood. One mL ice-cold methanol containing 1 ng  
358 internal standards (PGE<sub>2</sub>-d<sub>4</sub>, 15-HETE-d<sub>8</sub>, LTB<sub>4</sub>-d<sub>4</sub>, 14,15- EET-d<sub>11</sub>, 14,15-dHET-d<sub>11</sub>, 9,10-EpOME-  
359 d<sub>4</sub>, 9,10-DiHOME-d<sub>4</sub>, RvD2-d<sub>5</sub>, EPA-d<sub>5</sub> and 8-iso-PGF<sub>2α</sub>-d<sub>4</sub>; Cayman Chemical, USA) was added to  
360 0.5 mL plasma, after which samples were centrifuged to remove precipitated proteins (600g for 10 min  
361 at 4°C). The supernatant was diluted to <10% methanol content by the addition of 9 mL double distilled  
362 (dd)H<sub>2</sub>O and acidified to pH 3.5 with 1 M HCl. Each sample was then applied to a solid-phase extraction  
363 (SPE) column (Isolute C18, 500 mg/6 mL, Biotage, Sweden), which had been conditioned with 2 ×  
364 6 mL methanol, followed by 2 × 6 mL ddH<sub>2</sub>O. The column was subsequently washed with a further  
365 6 mL ddH<sub>2</sub>O and 2 × 5 mL hexane before elution of the eicosanoids with 2 × 3 mL ethyl acetate. The  
366 ethyl acetate fraction was dried under vacuum and then resuspended in 50:50 (v/v) mobile phase  
367 A:mobile phase B, where mobile phase A consisted of H<sub>2</sub>O:methanol 90:10 (v/v) containing 0.1% (v/v)  
368 acetic acid and mobile phase B consisted of methanol containing 0.1% (v/v) acetic acid. All solvents  
369 were LC-MS grade (Fisher Scientific, UK).

370 Eicosanoids were separated on a Hypersil GOLD C18 column (1.9 μm; 100 x 2.1 mm) (Thermo,  
371 UK) using a Shimadzu Nexera-X2 UHPLC system. The initial gradient conditions for analysis were  
372 55% mobile phase A -45% mobile phase B. The percentage of mobile phase B was increased from 45%  
373 to 60% over 10 min, followed by 60% to 70% over 1 min, a linear increase to 100% between 11-18 min,  
374 held for 2 min before re-equilibration to the starting conditions over 5 min. The flow rate was  
375 400 μL/min. The LC effluent was directed into an IonTurbo source of a Sciex QTRAP 6500 mass  
376 spectrometer. The instrument was operated in negative ion mode using the multiple reaction monitoring.  
377 Eicosanoids were identified on the basis of their characteristic precursor/product ion pair transitions and  
378 matching retention time with authentic standards. Data were acquired and analysed using Sciex Analyst  
379 software v1.6. Concentrations of eicosanoids were determined by comparison to a calibration curve run

380 in parallel for each compound and adjusted for recovery by reference to amounts of the appropriate  
381 internal standards.

382

### 383 **General data and statistical analysis**

384 Data were analysed using Excel 2010 (Microsoft, USA), R 3.2.2 (R Foundation for Statistical  
385 Computing, Austria) and Prism 9.3 (Graphpad, USA). Data in table are presented as mean  $\pm$  standard  
386 deviation, unless otherwise indicated. Continuous data are presented as means and standard deviation  
387 and statistical significance within groups and between groups were tested using two-way analysis of  
388 variance (ANOVA) with Tukey's Honest Significant Difference post-hoc test. Parametric assumptions  
389 (normal distribution and equal variances) were confirmed using the statistical packages above; where  
390 data was not normally distributed a non-parametric alternative (e.g. Kruskal-Wallis test) was used.

391

392

393

## 394 **Supplementary Results and Discussion**

395

### 396 **Participant characteristics**

397 Fourteen healthy non-smoking volunteers between the age of 18-40 years were recruited for this study.  
398 Median height was 172 [169-177] cm. Body weight and body mass index measurements were 65.6  
399 [60.7-71.9] kg and 22.8 [21.1-24] kg/m<sup>2</sup>, respectively.

400

### 401 **Lung function, heart rate and blood pressure**

402 There were no differences between exposure groups for any of the vital statistics or lung function  
403 parameters reported in *Extended Data Table ED3*. Epidemiological studies have demonstrated that  
404 exposure to PM in air pollution is associated with decreases in FEV<sub>1</sub> and FVC<sup>17</sup>. However, controlled  
405 exposure studies demonstrate that acute exposure to combustion-derived nanoparticles can induce a  
406 pulmonary inflammation, although there is inconsistency in the data as to whether this is associated  
407 with changes in airway reactivity<sup>18,19</sup>. In a real-life exposure to diesel emissions in an automotive train,  
408 ultrafine- and carbon black-rich diesel exhaust reduced lung function (3.6% reduction in FEV<sub>1</sub>)  
409 compared to a comparative exposure on an electric train.<sup>20</sup>

410 A review of pre-clinical studies investigating the effect of GO on pulmonary inflammation<sup>21</sup>,  
411 identified no direct effects on airway reactivity. Studies in rats have found that a 5-h<sup>22</sup> or 5-day<sup>23</sup>  
412 inhalation of mg/m<sup>3</sup> concentrations of GO did not induce pulmonary inflammation in rats, nor did a  
413 28-day exposure to graphene nanoplatelets<sup>24</sup>. Toxicological studies in mice with the same GO  
414 materials as the current study found that both a single or repeated pulmonary exposure induced a mild  
415 and transient pulmonary inflammation<sup>25-27</sup> which resolved more quickly with smaller (nm range)  
416 lateral dimension particles. Neither s-GO nor us-GO nanosheets were associated with airway fibrosis  
417 across the 28- or 90-day follow-up<sup>25,28</sup>. Two other studies have found a greater pro-inflammatory  
418 effect of larger sizes of GO compared to smaller sizes of the same material<sup>29,30</sup>. Thus, it is feasible that  
419 GO with greater lateral dimension could have induced inflammation and changes to lung function.

420 Three-dimensional human bronchial tissue constructs have been used to demonstrate a pro-  
421 inflammatory response to GO<sup>31</sup>, albeit at concentrations based on long-term exposure. More recently,  
422 the impact of some of the GO used in the present study<sup>32</sup> on a functional human lung organoid system  
423 (developed from hES cells) further indicated moderate and transient responses of human lung  
424 organoids to ultrasmall GO sheets. While the model and associated data set were not fully available  
425 when the controlled human inhalation-exposure study was performed, the three dimensional human  
426 lung organoid model confirms the results obtained in mice, highlighting the limited response of human  
427 lung organoids to ultrasmall GO sheets and the more adverse effects of large micrometric GO sheets  
428 (the latter excluded from our present human study). Biomarkers of pulmonary inflammation would be  
429 a valuable addition to future human-controlled nanomaterial exposures and potentially allow

430 extrapolation from murine models to predict the pulmonary effects of longer-term exposure in  
431 humans.

432 Interestingly, a mouse model of asthma has demonstrated that GO can sensitise airway  
433 responsiveness to the agonist methacholine. However, there was no direct effect of GO at the time of  
434 the challenge, and responses did not align with markers of pulmonary inflammation<sup>33</sup>. Asthmatic  
435 individuals were excluded from our study and represent a potentially susceptible group for future  
436 investigations.

437

438

#### 439 **Platelet numbers and coagulation markers**

440 There were no differences between exposure groups for any of the blood platelet numbers or coagulation  
441 markers reported in *Extended Data Table ED4*. GO can directly interact with blood to induce  
442 conformational changes to fibrinogen and activate complement (C3a, C5a) and intrinsic coagulation  
443 (prothrombin) pathways<sup>34</sup>. Direct exposure of platelets to GO can activate platelets and increase the  
444 occurrence of thrombus in pulmonary vessels after intravenous injection<sup>35</sup>. However, these effects were  
445 dependent on the degree of GO surface functionalisation, while other forms of graphene have minimal  
446 direct effects on haemolysis, platelet activation, prothrombin time and activated partial thromboplastin  
447 time<sup>36</sup>. It should be borne in mind that these experiments were performed with high concentrations of  
448 GO (>0.05 mg/mL) that are orders of magnitude higher than what would be expected to translocate to  
449 the circulation after inhalation<sup>8,37</sup>. Accordingly, five days inhalation of GO in rats also showed no effect  
450 on these measures of coagulation<sup>23</sup>.

451

#### 452 **Markers of inflammation in blood**

453 GO can activate macrophages through internalisation and induction of complex cellular signalling  
454 mechanisms, which are dependent on the dimensions of GO. Smaller nanosheets may have a greater  
455 capacity to generate intracellular reactive oxygen species, whereas larger GO can induce necrosis and  
456 apoptosis through physical interactions with the cell membrane<sup>38</sup>. In the present study, there was no  
457 significant difference between exposure groups for any of the blood inflammatory cells counts or  
458 inflammatory cell biomarkers reported in *Extended Data Table ED5*.

459 Controlled exposure to diesel exhaust emissions induces a mild increase in blood neutrophils,  
460 IL-6 and TNF $\alpha$ <sup>10,19,39</sup>, although alterations in these biomarkers have not been consistent between  
461 studies. Levels of inflammatory cytokines may have been greater at time points after 6-h, although  
462 there was inconsistency across markers of inflammation 24-h after diesel exhaust exposure<sup>10</sup>. Markers  
463 of oxidative and genotoxic effects have been shown to be increased, and reduced six months after the  
464 installation of workplace filters, in a cohort of six workers in a graphene manufacturing facility<sup>40</sup>. The  
465 authors note that it was not possible to discriminate whether these effects could be attributed to  
466 nanomaterials or other chemical exposures, but these biomarkers may be suitable for biomonitoring

467 (see also <sup>41</sup>). We have previously demonstrated that spark-generated carbon black particles are unable  
468 to induce a systemic inflammatory response in healthy volunteers<sup>7</sup>. This is also in keeping with the  
469 available pre-clinical evidence for graphene materials, where pristine graphene did not directly release  
470 cytokines from peripheral blood monocytes<sup>36</sup>. Furthermore, inhalation of GO in mice induced only  
471 mild increases in circulatory inflammatory cells or cytokines<sup>22,23</sup> at high doses (>3 mg/m<sup>3</sup>) that are  
472 likely to be associated with lung overload and do not extrapolate to anticipated real-life exposure  
473 scenarios in humans<sup>42,43</sup>. Previous studies have demonstrated that GO can induce an acute phase  
474 response in the liver of GO instilled mice<sup>44</sup>. The lack of effect of GO on C-reactive protein in the  
475 current study suggests that there was insufficient translocation of GO to the liver, or that the purity of  
476 GO may minimise the acute phase response, although the profile of the response at later time points  
477 remains to be confirmed. Studies making a direct comparison of our high purity materials and  
478 commercial sources of GO that are typically less pure and more heterogenous in their size distribution  
479 would be valuable.

480

#### 481 **Targeted lipidomics to identify the effects of graphene oxide on eicosanoids**

482 Eicosanoids represent a group of diverse mediators formed from the polyunsaturated fatty acid,  
483 arachidonic acid. Prostaglandins, leukotrienes, hydroxy-eicosatetraenoic acids (HETEs) and  
484 epoxyeicosatrienoic/dihydroeicosatrienoic acids (EETs/dHETs), formed via enzymatic activation of  
485 arachidonic acid, are recognised to be important mediators in the onset and progression of inflammation.  
486 The free radical-mediated peroxidation of arachidonic acid leads to the production of isoprostanes,  
487 which are biomarkers of oxidative stress that is a hallmark of particle-induced cellular dysfunction.  
488 Several studies have found that exposure to particulate air pollution in China is associated with increases  
489 in a variety of proinflammatory eicosanoid levels in the blood of humans<sup>45-47</sup>. In mice, inhalation of  
490 nanoparticle-rich diesel exhaust has been shown to increase several eicosanoids (HETEs, HODEs,  
491 isoprostanes) in the lung lining fluid, plasma, liver and intestines; DE caused oxidative stress and  
492 dysfunction of anti-oxidant/anti-inflammatory high-density lipoprotein in the same model<sup>48</sup>. Although  
493 very few studies have investigated the effect of graphene materials on eicosanoids, graphene  
494 nanoplatelets altered arachidonic metabolism in a macrophage cell line at non-cytotoxic  
495 concentrations<sup>49</sup>, and low levels of GO modified arachidonic acid and eicosanoids in the brains of  
496 zebrafish.

497 Blood from a subset of participants (n=3) was used to collect preliminary data for eicosanoid  
498 profiling. Thirty five out of the fifty five eicosanoid species were detected in the plasma of volunteers,  
499 with eighteen species showing a significant difference between the graphene oxides and air (***Extended***  
500 ***Data Figure ED2 and Table ED6***) prior to correction for multiple testing. Both s-graphene oxide and  
501 us-graphene oxide increased levels of several dHETs and HETEs, whereas greater levels of arachidonic  
502 acid, eicosapentaenoic acid and DHA were found after exposure to s-graphene oxide, but not us-  
503 graphene oxide. However, after adjusting for multiple comparisons, only six eicosanoids were



504 significantly different from the air group with a  $p \leq 0.001$ : 14,15\_dHET, arachidonic acid (AA) and  
505 docosahexaenoic acid (DHA) were greater for s-GO; 10\_carboxy\_LTB<sub>4</sub>, 5,6\_dHET and 14\_HDHA  
506 were greater for us-GO. 14,15-dHET has been reported to impair neutrophil function<sup>50</sup>. Furthermore,  
507 dHETs are metabolites of EETs which have a variety of roles in the lung and cardiovascular system,  
508 including vasodilatation, and anti-thrombotic and anti-inflammatory properties<sup>51</sup>. 14,15-EET has been  
509 shown to provide some protection against cigarette smoke-induced lung injury<sup>52</sup>. However, there was  
510 no measurable change in 14,15-EET levels in response to GO suggesting that GO did not have overt  
511 effects on EET metabolism. Increased arachidonic acid formation would suggest that s-GO stimulates  
512 the activation of phospholipase-A<sub>2</sub> via Ca<sup>2+</sup> mobilisation, increasing the availability of the substrate for  
513 other subsequent eicosanoid pathways. Nano-sized air pollution particles have been shown to increase  
514 arachidonic acid and downstream eicosanoids in mice, an effect that was accompanied by inflammation  
515 in the gastrointestinal tract (which is exposed to particles following mucociliary clearance from the  
516 lung)<sup>53</sup>. In the absence of alterations in downstream eicosanoids, neither of these eicosanoids are likely  
517 to represent rate-limiting steps, although it is possible that mobilisation of this substrate may have an  
518 influence on eicosanoid formation when other pathways are active, e.g. in the presence of a marked  
519 inflammatory response. Different mechanisms may be at play for the release of the fatty acids  
520 arachidonic acid and DHA as these are substrates leading to the generation of pro-inflammatory  
521 eicosanoids and pro-resolving mediators, respectively. 10\_carboxy\_LTB<sub>4</sub> is a metabolite of the  
522 inflammatory mediator LTB<sub>4</sub>, although LTB<sub>4</sub> was not detectable in these plasma samples. 5,6-dHET is  
523 also a metabolite 5,6-EETs which has been shown to dilate pulmonary blood vessels<sup>54</sup>, however, the  
524 latter was not affected by GO exposure. 14\_HDHA is a pathway marker for the pro-resolving mediator  
525 maresin<sup>55</sup>, suggesting the increased production of 14\_HDHA could represent the initial stages of a  
526 counter response to inflammation, although maresin itself was not significantly increased by either GO.  
527 However, caution is required in drawing conclusions from a small number of volunteers, and given the  
528 small number of eicosanoid species that differed between exposures (6 out of 55 lipids in the panel at  
529  $p \leq 0.001$ ), differences in baseline ( $t=0$ ) levels of eicosanoids, the small magnitude of differences, and  
530 the lack of a consistent pattern for specific graphene oxide sizes, we do not feel it is appropriate to  
531 speculate further. Nonetheless, the eicosanoid species identified in the present study, and their  
532 regulatory pathways, could be included or targeted in future omic-studies exploring the mechanisms by  
533 which graphene oxide, or other MNMs, induce downstream effects.

534

535

536

## 537 Supplementary References

- 538 1. Jasim, D. A., Lozano, N. & Kostarelos, K. Synthesis of few-layered, high-purity graphene oxide sheets  
539 from different graphite sources for biology. *2D Mater.* **3**, 014006 (2016).
- 540 2. Rodrigues, A. F. *et al.* A blueprint for the synthesis and characterisation of thin graphene oxide with  
541 controlled lateral dimensions for biomedicine. *2D Mater.* **5**, 035020 (2018).
- 542 3. Biesinger, M. C. Accessing the robustness of adventitious carbon for charge referencing (correction)  
543 purposes in XPS analysis: Insights from a multi-user facility data review. *Appl. Surf. Sci.* (2022).
- 544 4. Mukherjee, S. P. *et al.* Detection of endotoxin contamination of graphene based materials using the  
545 TNF- $\alpha$  expression test and guidelines for endotoxin-free graphene oxide production. *PLoS One* **11**,  
546 e0166816 (2016).
- 547 5. Mills, N. L. *et al.* Diesel exhaust inhalation causes vascular dysfunction and impaired endogenous  
548 fibrinolysis. *Circulation* **112**, 3930–3936 (2005).
- 549 6. Lucking, A. J. *et al.* Diesel exhaust inhalation increases thrombus formation in man. *Eur. Heart J.* **29**,  
550 3043–3051 (2008).
- 551 7. Mills, N. L. *et al.* Combustion-derived nanoparticulate induces the adverse vascular effects of diesel  
552 exhaust inhalation. *Eur. Heart J.* **32**, 2660–2671 (2011).
- 553 8. Miller, M. R. *et al.* Inhaled nanoparticles accumulate at sites of vascular disease. *ACS Nano* **11**, 4542–  
554 4552 (2017).
- 555 9. Mills, N. L. *et al.* Diesel exhaust inhalation causes vascular dysfunction and impaired endogenous  
556 fibrinolysis. *Circulation* **112**, 3930–3936 (2005).
- 557 10. Törnqvist, H. *et al.* Persistent endothelial dysfunction in humans after diesel exhaust inhalation. *Am. J.*  
558 *Respir. Crit. Care Med.* **176**, 395–400 (2007).
- 559 11. Cherrie, J. W. *et al.* Effectiveness of face masks used to protect Beijing residents against particulate air  
560 pollution. *Occup. Environ. Med.* **75**, 446–452 (2018).
- 561 12. Lucking, A. J. *et al.* Particle traps prevent adverse vascular and prothrombotic effects of diesel engine  
562 exhaust inhalation in men. *Circulation* **123**, 1721–1728 (2011).
- 563 13. Wilson, S. J. *et al.* Exosite 1 thrombin inhibition with JNJ-64179375 inhibits thrombus formation in a  
564 human translational model of thrombosis. *Cardiovasc. Res.* **115**, 669–677 (2019).
- 565 14. Meah, M. N. *et al.* Antithrombotic effects of combined PAR (Protease-Activated Receptor)-4  
566 antagonism and factor Xa inhibition. *Arterioscler. Thromb. Vasc. Biol.* **40**, 2678–2685 (2020).
- 567 15. Hadjidemetriou, M. *et al.* In vivo biomolecule corona around blood-circulating, clinically used and  
568 antibody-targeted lipid bilayer nanoscale vesicles. *ACS Nano* **9**, 8142–8156 (2015).
- 569 16. Hadjidemetriou, M. *et al.* Nano-scavengers for blood biomarker discovery in ovarian carcinoma. *Nano*  
570 *Today* **34**, 100901 (2020).
- 571 17. Edginton, S., O’Sullivan, D. E., King, W. & Lougheed, M. D. Effect of outdoor particulate air pollution  
572 on FEV 1 in healthy adults: a systematic review and meta-analysis. *Occup. Environ. Med.* **76**, 583–591  
573 (2019).
- 574 18. Nightingale, J. A. *et al.* Airway inflammation after controlled exposure to diesel exhaust particulates.  
575 *Am. J. Respir. Crit. Care Med.* **162**, 161–166 (2000).
- 576 19. Holgate, S. T. *et al.* Health effects of acute exposure to air pollution. Part I: Healthy and asthmatic  
577 subjects exposed to diesel exhaust. *Res. Rep. Health. Eff. Inst.* 1–30; discussion 51–67 (2003).
- 578 20. Andersen, M. H. G. *et al.* Health effects of exposure to diesel exhaust in diesel-powered trains. *Part.*  
579 *Fibre Toxicol.* **16**, 21 (2019).
- 580 21. Pelin, M., Sosa, S., Prato, M. & Tubaro, A. Occupational exposure to graphene based nanomaterials:  
581 risk assessment. *Nanoscale* **10**, 15894–15903 (2018).
- 582 22. Han, S. G. *et al.* Pulmonary responses of Sprague-Dawley rats in single inhalation exposure to graphene

- 583 oxide nanomaterials. *Biomed Res. Int.* **2015**, 1–9 (2015).
- 584 23. Kim, Y. H. *et al.* Short-term inhalation study of graphene oxide nanoplates. *Nanotoxicology* **12**, 224–238  
585 (2018).
- 586 24. Kim, J. K. *et al.* 28-Day inhalation toxicity of graphene nanoplatelets in Sprague-Dawley rats.  
587 *Nanotoxicology* **10**, 891–901 (2016).
- 588 25. Rodrigues, A. F. *et al.* Size-dependent pulmonary impact of thin graphene oxide sheets in mice: Toward  
589 safe-by-design. *Adv. Sci.* **7**, 1903200 (2020).
- 590 26. Loret, T. *et al.* Innate but not adaptive immunity regulates lung recovery from chronic exposure to  
591 graphene oxide nanosheets. *Adv. Sci.* **9**, 2104559 (2022).
- 592 27. de Luna, L. A. V. *et al.* Lung recovery from DNA damage induced by graphene oxide is dependent on  
593 size, dose and inflammation profile. *Part. Fibre Toxicol.* **19**, 62 (2022).
- 594 28. Vranic, S. *et al.* Live imaging of label-free graphene oxide reveals critical factors causing oxidative-  
595 stress-mediated cellular responses. *ACS Nano* **12**, 1373–1389 (2018).
- 596 29. Sydlik, S. A., Jhunjunwala, S., Webber, M. J., Anderson, D. G. & Langer, R. In vivo compatibility of  
597 graphene oxide with differing oxidation states. *ACS Nano* **9**, 3866–3874 (2015).
- 598 30. Li, R. *et al.* Enhancing the imaging and biosafety of upconversion nanoparticles through phosphonate  
599 coating. *ACS Nano* **9**, 3293–3306 (2015).
- 600 31. Di Cristo, L. *et al.* Repeated exposure to aerosolized graphene oxide mediates autophagy inhibition and  
601 inflammation in a three-dimensional human airway model. *Mater. Today Bio* **6**, 100050 (2020).
- 602 32. Issa, R., Lozano, N., Kostarelos, K., Vranic, S. Functioning human lung organoids model pulmonary  
603 tissue response from carbon nanomaterial exposures. *BioRxiv* April 2023  
604 doi:<https://doi.org/10.1101/2023.03.30.534957>.
- 605 33. Shurin, M. R. *et al.* Graphene oxide attenuates Th2-type immune responses, but augments airway  
606 remodeling and hyperresponsiveness in a murine model of asthma. *ACS Nano* **8**, 5585–5599 (2014).
- 607 34. Feng, R., Yu, Y., Shen, C., Jiao, Y. & Zhou, C. Impact of graphene oxide on the structure and function  
608 of important multiple blood components by a dose-dependent pattern. *J. Biomed. Mater. Res. Part A*  
609 **103**, 2006–2014 (2015).
- 610 35. Singh, S. K. *et al.* Amine-modified graphene: thrombo-protective safer alternative to graphene oxide for  
611 biomedical applications. *ACS Nano* **6**, 2731–2740 (2012).
- 612 36. Sasidharan, A. *et al.* Hemocompatibility and macrophage response of pristine and functionalized  
613 graphene. *Small* **8**, 1251–1263 (2012).
- 614 37. Rodrigues, A. F. *et al.* Size-dependent pulmonary impact of thin graphene oxide sheets in mice: toward  
615 safe-by-design. *Adv. Sci.* **7**, 1903200 (2020).
- 616 38. Dudek, I., Skoda, M., Jarosz, A. & Szukiewicz, D. The molecular influence of graphene and graphene  
617 oxide on the immune system under in vitro and in vivo conditions. *Arch. Immunol. Ther. Exp. (Warsz)*.  
618 **64**, 195–215 (2016).
- 619 39. Salvi, S. *et al.* Acute inflammatory responses in the airways and peripheral blood after short-term  
620 exposure to diesel exhaust in healthy human volunteers. *Am. J. Respir. Crit. Care Med.* **159**, 702–709  
621 (1999).
- 622 40. Cavallo, D. *et al.* A follow-up study on workers involved in the graphene production process after the  
623 introduction of exposure mitigation measures: evaluation of genotoxic and oxidative effects.  
624 *Nanotoxicology* **16**, 776–790 (2022).
- 625 41. Fadeel, B. *et al.* Safety assessment of graphene-based materials: Focus on human health and the  
626 environment. *ACS Nano* **12**, 10582–10620 (2018).
- 627 42. Lee, J. H. *et al.* Exposure monitoring of graphene nanoplatelets manufacturing workplaces. *Inhal.*  
628 *Toxicol.* **28**, 281–291 (2016).
- 629 43. Vaquero, C., Wendelbo, R., Egizabal, A., Gutierrez-Cañas, C. & López de Ipiña, J. Exposure to  
630 graphene in a pilot production plant. *J. Phys. Conf. Ser.* **1323**, 012005 (2019).
- 631 44. Bengtson, S. *et al.* Differences in inflammation and acute phase response but similar genotoxicity in

632 mice following pulmonary exposure to graphene oxide and reduced graphene oxide. *PLoS One* **12**,  
633 e0178355 (2017).

634 45. Wang, T. *et al.* Changes in bioactive lipid mediators in response to short-term exposure to ambient air  
635 particulate matter: A targeted lipidomic analysis of oxylipin signaling pathways. *Environ. Int.* **147**,  
636 106314 (2021).

637 46. Wang, T. *et al.* Proinflammatory lipid signals trigger the health effects of air pollution in individuals  
638 with prediabetes. *Environ. Pollut.* **290**, 118008 (2021).

639 47. Du, X. *et al.* Dynamic molecular choreography induced by traffic exposure: A randomized, crossover  
640 trial using multi-omics profiling. *J. Hazard. Mater.* **424**, 127359 (2022).

641 48. Rezaee, M., Behnam, B., Banach, M. & Sahebkar, A. The Yin and Yang of carbon nanomaterials in  
642 atherosclerosis. *Biotechnol. Adv.* **36**, 2232–2247 (2018).

643 49. Adamson, S. X.-F., Wang, R., Wu, W., Cooper, B. & Shannahan, J. Metabolomic insights of  
644 macrophage responses to graphene nanoplatelets: Role of scavenger receptor CD36. *PLoS One* **13**,  
645 e0207042 (2018).

646 50. Bergmann, C. B. *et al.* TPPU treatment of burned mice dampens inflammation and generation of  
647 bioactive DHET which impairs neutrophil function. *Sci. Rep.* **11**, 16555 (2021).

648 51. Zordoky, B. N. M. & El-Kadi, A. O. S. Effect of cytochrome P450 polymorphism on arachidonic acid  
649 metabolism and their impact on cardiovascular diseases. *Pharmacol. Ther.* **125**, 446–463 (2010).

650 52. Yu, G. *et al.* 14,15-Epoxyeicosatrienoic acid suppresses cigarette smoke extract-induced apoptosis in  
651 lung epithelial cells by inhibiting endoplasmic reticulum stress. *Cell. Physiol. Biochem.* **36**, 474–486  
652 (2015).

653 53. Li, R. *et al.* Effect of exposure to atmospheric ultrafine particles on production of free fatty acids and  
654 lipid metabolites in the mouse small intestine. *Environ. Health Perspect.* **123**, 34–41 (2015).

655 54. Stephenson, A. H., Sprague, R. S. & Lonigro, A. J. 5,6-Epoxyeicosatrienoic acid reduces increases in  
656 pulmonary vascular resistance in the dog. *Am. J. Physiol. Circ. Physiol.* **275**, H100–H109 (1998).

657 55. Mozurkewich, E. L. *et al.* Pathway markers for pro-resolving lipid mediators in maternal and umbilical  
658 cord blood: A secondary analysis of the mothers, omega-3, and mental health study. *Front. Pharmacol.*  
659 **07**, (2016).

660

661  
662  
663

## SUPPLEMENTARY TABLES AND FIGURES

**SUPPLEMENTARY TABLE S1. Volunteer inclusion and exclusion criteria.**

| <b>INCLUSION CRITERIA</b>                                                                                    | <b>EXCLUSION CRITERIA</b>                                                                     |
|--------------------------------------------------------------------------------------------------------------|-----------------------------------------------------------------------------------------------|
| Male or female between 18-40 years                                                                           | Smoked tobacco or related products within one year prior to the study                         |
| Judged to be in good health based on medical history, physical examination, vital signs and laboratory tests | Asthmatic                                                                                     |
| Body mass index between 18-35 kg/m <sup>2</sup> , and body weight between 50-120 kg                          | Occupation with a high exposure to air pollution or other inhaled irritants                   |
| Willing and able to donate blood                                                                             | Severe or significant medical condition                                                       |
| Have not taken part in other clinical research within the previous 3 months                                  | Use of any regular prescribed medication within 7 days prior to the study                     |
| Willing and able to adhere to complete the screening visit and all 3 study visits                            | Intercurrent illness (for example: viral cold, influenza, chest infection)                    |
| No severe or significant medical condition and without intercurrent illness                                  | Use of aspirin or anti-inflammatory medication in the 7 days prior to the study               |
|                                                                                                              | Allergy or contraindication to vasodilator drugs (e.g. acetylcholine or sodium nitroprusside) |
|                                                                                                              | Major or traumatic surgery within 12 weeks of screening                                       |
|                                                                                                              | Pregnant or lactating women                                                                   |
|                                                                                                              | Given blood in the 3 months prior to the study                                                |

664  
665  
666

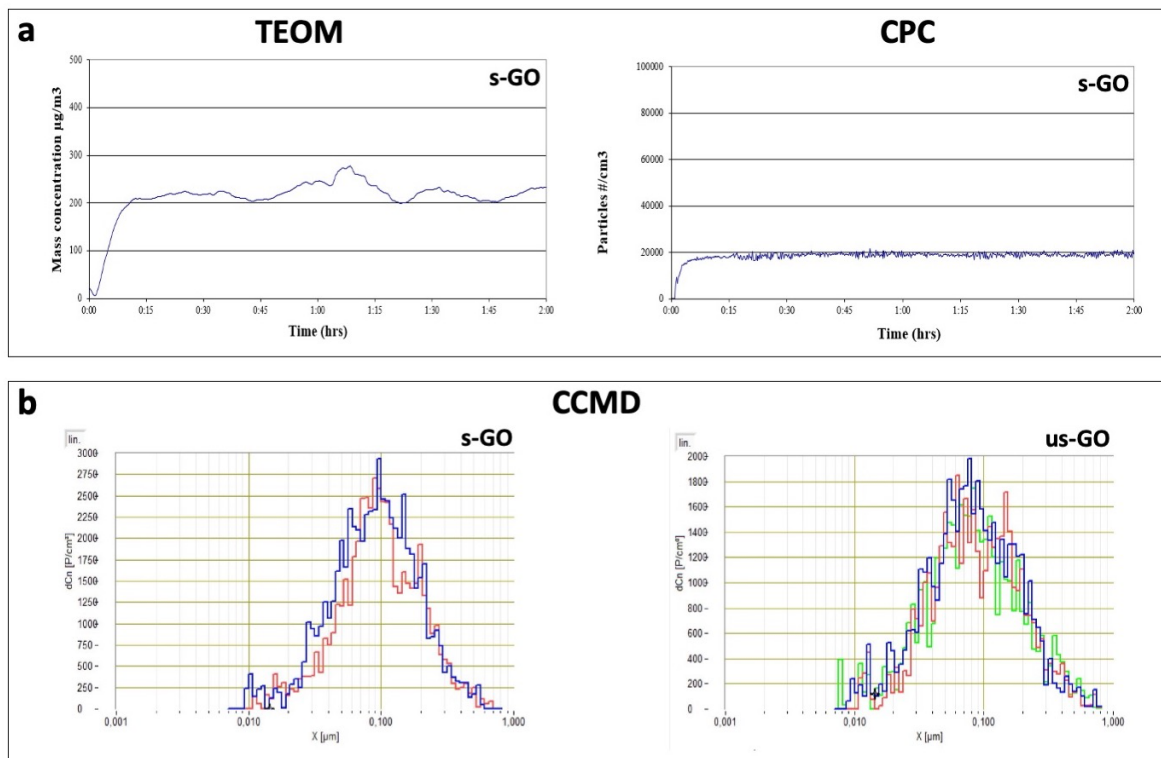

668

669

670

671

672

673

674

675

**SUPPLEMENTARY FIGURE S1. Particle exposure characteristics. a:** Particle mass in exposures measured by tapered element oscillating microbalance (TEOM), condensation particle counter (CPC). **b:** Particle size distribution via differential electrical mobility classifier. CCMD: count median mobility size distribution, s-GO: small graphene oxide, us-GO: ultrasmall graphene oxide.

676

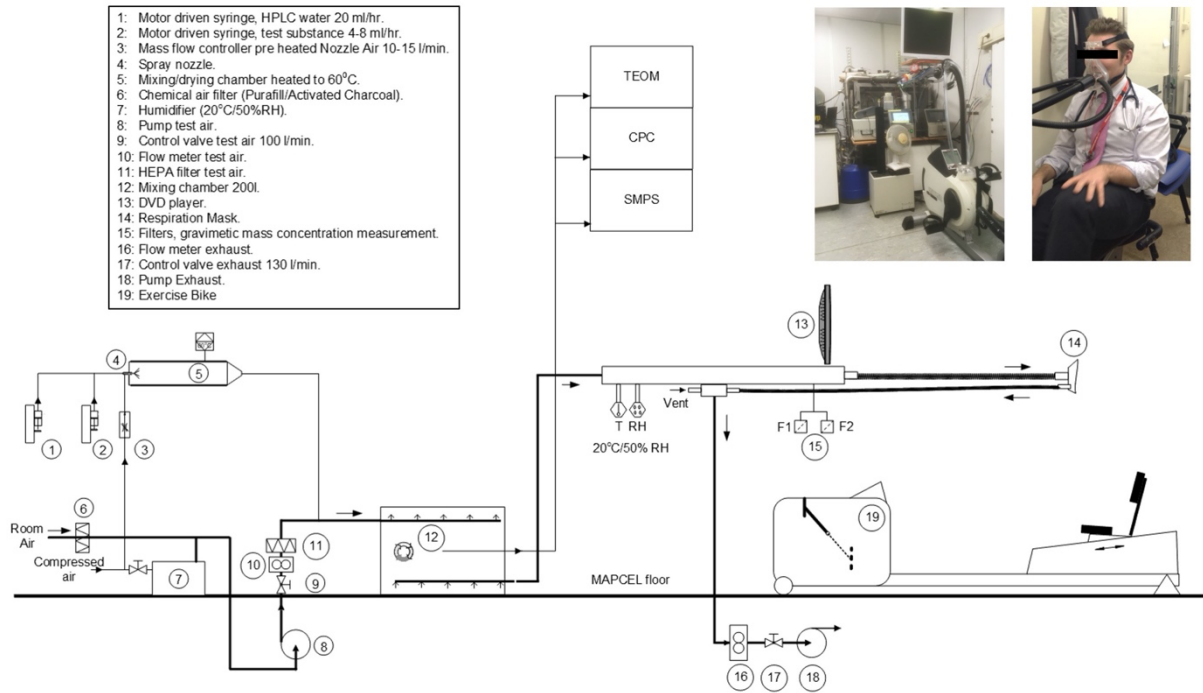

677

678

679

680

681

**SUPPLEMENTARY FIGURE S2. Schematic of the mobile exposure laboratory.** HEPA filter: high efficiency particulate air filter, HPLC water; high-performance liquid chromatography grade water, RH = relative humidity, T: temperature.
